# Supplementary material
Source: PubMed Central journal article supplement (PMC4325098)
Supplement: JB.02346-14_zjb999093518so1.pdf [file JB.02346-14_zjb999093518so1.pdf]

1  
2  
3  
4  
5  
6  
7  
8  
9  
10  
11  
12  
13  
14  
15

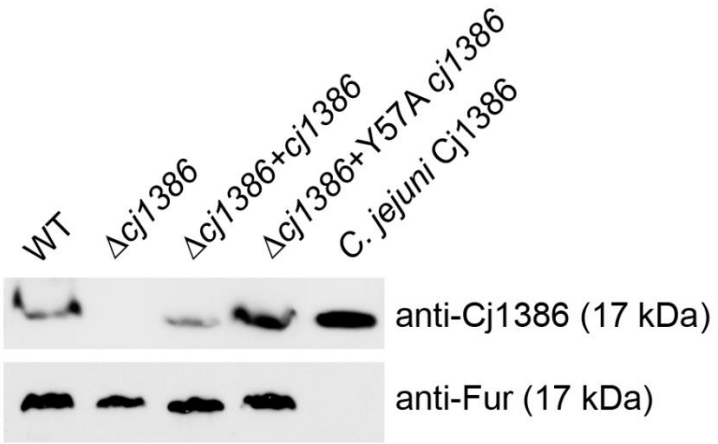

**Figure S1.** Y57A Cj1386 protein is expressed in the  $\Delta cj1386+cj1386^{Y57A}$  *C. jejuni* mutant construct at levels comparable to Cj1386<sup>WT</sup> expression. Bacterial cultures were grown in MEM $\alpha$  media at 37°C under microaerophilic conditions. Bacterial cultures were pelleted, resuspended in PBS + protease inhibitor and soluble proteins were extracted following sonication. Two hundred and forty micrograms of lysates or 100 ng of purified Cj1386 were separated by SDS PAGE on a 14% polyacrylamide gel followed by immunoblotting. (Upper) Wild-type (WT),  $\Delta cj1386$ ,  $\Delta cj1386+cj1386^{WT}$  and  $\Delta cj1386+cj1386^{Y57A}$  lysates and Cj1386 protein was detected using an anti-Cj1386 antiserum. (Bottom) Loading control of total protein contents as detected by an anti-Fur antiserum.

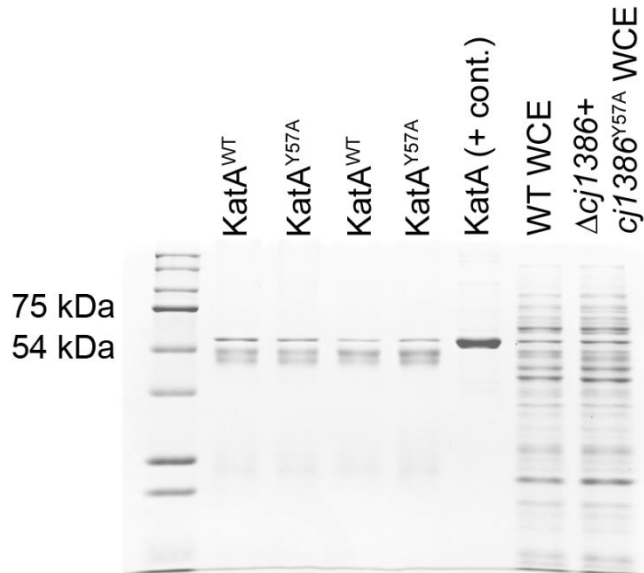

16

17

18 **Figure S2.** Immunoprecipitation of KatA from wild type and  $\Delta cj1386+cj1386^{Y57A}$  *C. jejuni*  
 19 strains. KatA was immunoprecipitated from prepared wild type and  $\Delta cj1386+cj1386^{Y57A}$   
 20 whole cell extracts and eluted in 50 mM glycine, pH 2.8. Four microlitres of each  
 21 immunoprecipitated sample, 1 $\mu$ g of purified KatA, and 5  $\mu$ g of whole cell extract were  
 22 separated on a 10% SDS-PAGE gel and visualized by coomassie staining.

23

24

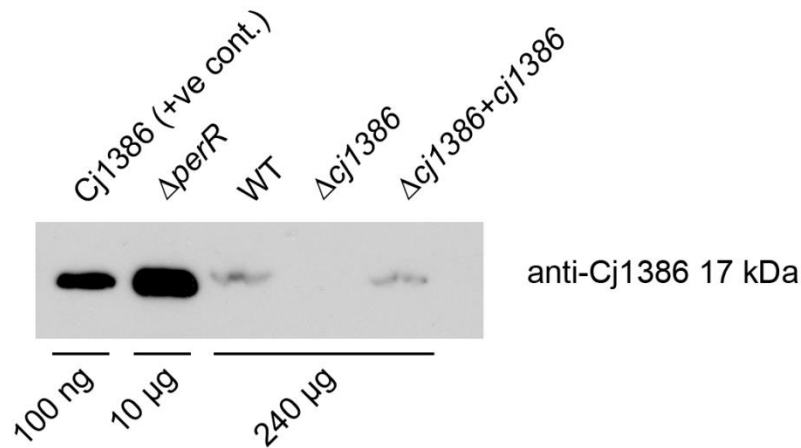

25

26 **Figure S3.** Cj1386 is expressed at low levels in wild-type *C.jejuni*. Bacterial cultures  
27 were grown in MEM $\alpha$  media at 37°C under microaerophilic conditions. Bacterial cultures  
28 were pelleted, resuspended in PBS + protease inhibitor and soluble proteins were  
29 extracted following sonication. Two hundred and forty micrograms of wild-type,  $\Delta cj1386$ ,  
30 and  $\Delta cj1386+cj1386$  lysate, 10  $\mu$ g of  $\Delta perR$  lysate, and 100 ng of purified Cj1386  
31 protein were separated by SDS PAGE on a 14% polyacrylamide gel. Proteins were  
32 visualized by Western blotting using an anti-Cj1386 antibody.
